# Supplementary material
Source: HighWire-hosted journal article supplement (https://bmjopenquality.bmj.com/highwire/filestream/136135/field_highwire_adjunct_files/1/ds2227.docx)
Supplement: ds2227.docx [file ds2227.docx]

**Figure 1: PDSA Cycles 1 &2**

**PDSA Cycle 1**

**Aim:** what are you trying to accomplish?

To improve the fluid resuscitation of patients with hyperemesis gravidarum (HG)

**Plan:** what will your test be?

A simple proforma for junior doctors to use when admitting patients with HG.

**Prediction:** what do you think will happen as a result of your test?

There will be improvements in prescription of potassium replacement and fluid resuscitation for these patients.

**Do:** what happened when you carried out your test?

Potassium prescribing did improve but not antiemetic prescription

**Study:** how did the results of your test compare with predictions?

The proforma did act as a helpful checklist but duplicated paperwork as doctors still needed to clerk patients in.

**Act:** how will you change your previous test in light of what you have learned?

Include a section for clerking the patient and a checklist of antiemetics to prescribe, as well as other medications required.

**PDSA Cycle 2**

**Aim:** what are you trying to accomplish?

To improve the fluid resuscitation and medication prescribing for patients with hyperemesis gravidarum (HG)

**Plan:** what will your test be?

A simple proforma for junior doctors to use when admitting patients with HG, amended following the first PDSA cycle.

**Prediction:** what do you think will happen as a result of your test?

There will be improvements in prescription of potassium replacement, fluid resuscitation and medication prescribing for these patients.

**Do:** what happened when you carried out your test?

Potassium prescribing improved from 10% to 100% and prescription of thiamine, folic acid and enoxaparin improved to 100%

**Study:** how did the results of your test compare with predictions?

The proforma was used as a clerking sheet and a prompt to aid prescribing.

**Act:** how will you change your previous test in light of what you have learned?

The proforma has been added to the trust intranet and is highlighted at the junior doctors’ induction programme. Administration of the fluid prescribed in a timely manner was found to be an issue so work is in progress to set up an outpatient service for these patients with dedicated nursing staff.
